# Supplementary material for: Design and engineering of neuroglobin to catalyze the synthesis of indigo and derivatives for textile dyeing
Source: Royal Society of Chemistry journal article supplement (doi:10.1039/d1me00123j), 2021-11-30
Supplement: d1me00123j1.pdf [file d1me00123j1.pdf]

## Supporting Information for

# Design and Engineering of Neuroglobin to Catalyze the Synthesis of Indigo and Derivatives for Textile Dyeing

Lei Chen <sup>a,‡</sup>, Jia-Kun Xu <sup>b,‡</sup>, Lianzhi Li <sup>c</sup>, Shu-Qin Gao <sup>d</sup>, Ge-Bo Wen <sup>d</sup>, and Ying-Wu  
Lin <sup>a,d\*</sup>

<sup>a</sup> School of Chemistry and Chemical Engineering, University of South China, Hengyang 421001,  
China;

<sup>b</sup> Key Lab of Sustainable Development of Polar Fisheries, Yellow Sea Fisheries Research Institute,  
Chinese Academy of Fishery Sciences, Qingdao 266071, China;

<sup>c</sup> School of Chemistry and Chemical Engineering, Liaocheng University, Liaocheng 252059,  
China;

<sup>d</sup> Lab of Protein Structure and Function, University of South China, Hengyang 421001, China.

<sup>‡</sup>These authors contributed equally.

Corresponding authors:

*E-mail address:* ywlin@usc.edu.cn

## Contents

- 1. Figure S1** ESI-MS spectra of A15C/H64D/F49Y Ngb. pS4
- 2. Figure S2** UV-Vis spectra of A15C/H64D/F49Y Ngb. pS4
- 3. Figure S3** Stopped-flow spectra of ferric A15C/H64D/F49Y Ngb in the reaction with H<sub>2</sub>O<sub>2</sub> or *m*-CPBA. pS5
- 4. Figure S4** Procedure for re-dissolving the product in DMF, and the UV-Vis spectra. pS6
- 5. Figure S5** ESI-MS spectra of the oxidation product of indole in precipitation catalyzed by A15C/H64D/F49Y Ngb. pS7
- 6. Figure S6** Solution color and UV-Vis spectral changes of the oxidation of indole catalyzed by WT Ngb. pS7
- 7. Figure S7** HPCL trace of indole and the calibration curve. pS8
- 8. Figure S8** HPLC analysis of the liquid supernatant and the precipitation of the reaction catalyzed by A15C/H64D/F49Y Ngb and A15C/H64D Ngb. pS9
- 9. Figure S9** Solution color and UV-Vis spectral changes of the oxidation of indole derivatives catalyzed by the A15C/H64D/F49Y Ngb. pS10
- 10. Figure S10** ESI-MS of the oxidation products of indole derivatives as catalyzed by A15C/H64D/F49Y Ngb. pS12
- 11. Figure S11** HPLC analysis of authentic samples of indole derivatives and oxidation products catalyzed by A15C/H64D/F49Y Ngb. pS13
- 12. Figure S12** Molecular docking structures of 5-chloroindole, 6-chloroindole, 7-chloroindole, 6-bromoindole, and 5-nitroindole in complex with A15C/H64D/F49Y Ngb. pS16
- 13. Figure S13** Solution color of 4,4'-dichloroindigo and 4,4'-dinitroindigo and that mixed in the volume of 1:1 and 2:1, respectively. pS17

- 14. Figure S14** Chemical reaction and ESI-MS of the oxidation products of co-substrates containing 4-chloroindole and 4-nitroindole catalyzed by A15C/H64D/F49Y Ngb. pS17
- 15. Table S1** The amounts of indigo, side products and unreacted indole after reaction catalyzed by Ngb mutants, and determined by HPLC. pS18
- 16. Table S2** Docking energy of indole binding to A15C/H64D/F49Y Ngb. pS19
- 17. Table S3** Docking energy of 4-chloroindole binding to A15C/H64D/F49Y Ngb. pS19
- 18. Table S4** Docking energy of 5-chloroindole binding to A15C/H64D/F49Y Ngb. pS20
- 19. Table S5** Docking energy of 6-chloroindole binding to A15C/H64D/F49Y Ngb. pS20
- 20. Table S6** Docking energy of 7-chloroindole binding to A15C/H64D/F49Y Ngb. pS21
- 21. Table S7** Docking energy of 4-nitroindole binding to A15C/H64D/F49Y Ngb. pS21
- 22. Table S8** Docking energy of 5-nitroindole binding to A15C/H64D/F49Y Ngb. pS22
- 23. Table S9** Docking energy of 6-bromoindole binding to A15C/H64D/F49Y Ngb. pS22

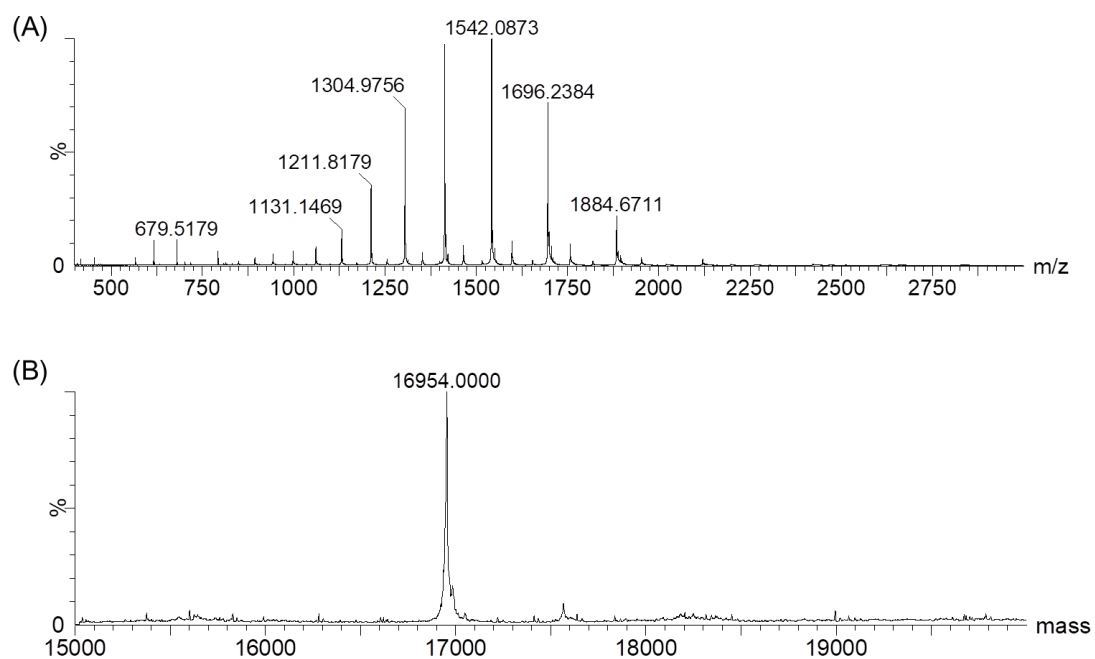

**Figure S1.** ESI-MS spectrum of A15C/H64D/F49Y Ngb. (A) The multiply-charged peaks, and (B) the observed mass 16954 Da (calculated apo-protein without formation of two disulfide bonds: 16959 Da).

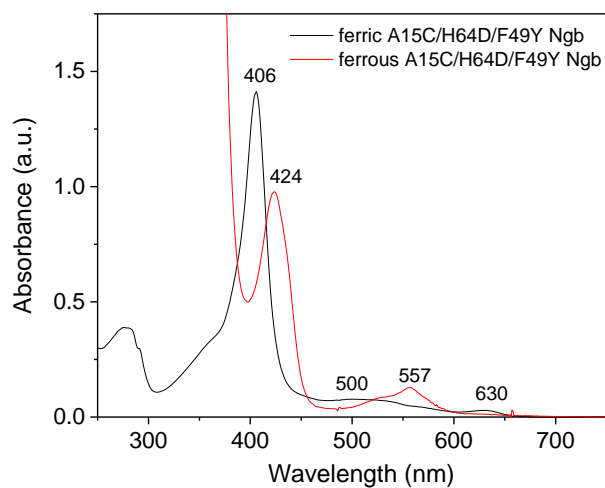

**Figure S2.** UV-Vis spectra of A15C/H64D/F49Y Ngb (10  $\mu$ M) in ferric (black) and ferrous (red) forms.

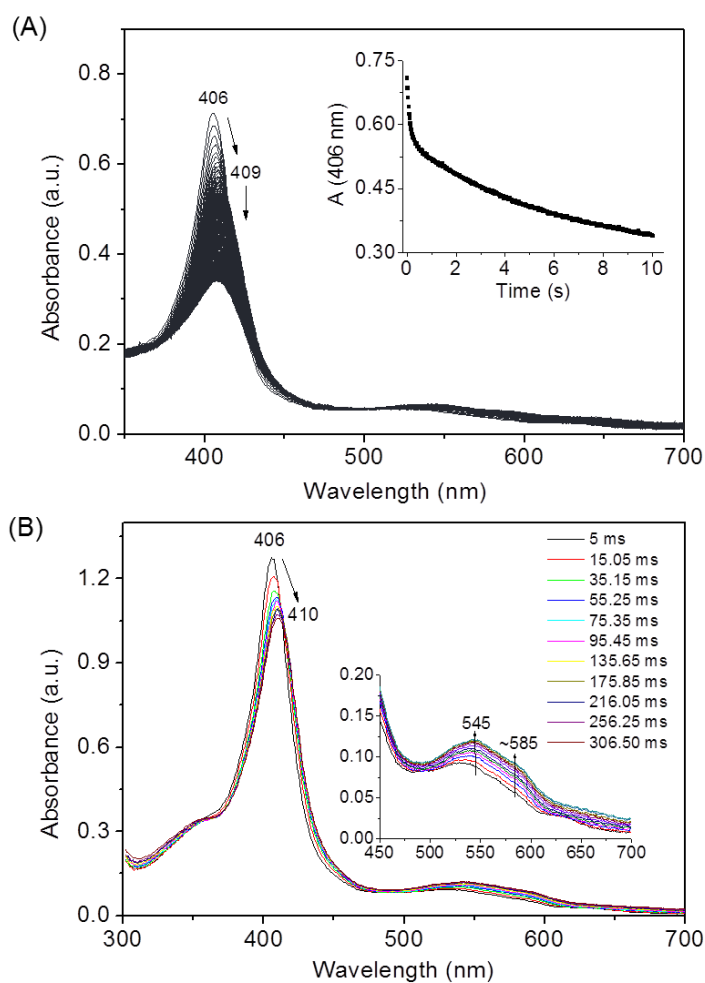

**Figure S3.** Stopped-flow spectra of ferric A15C/H64D/F49Y Ngb in the reaction with (A)  $\text{H}_2\text{O}_2$  (1 mM) at pH 6.0 for 10 sec, and the inset shows the decay of Soret band at 406 nm over time, and (B) *m*-CPBA (0.1 mM) at pH 6.0 for ~0.3 sec. The inset shows the changes of the visible bands.

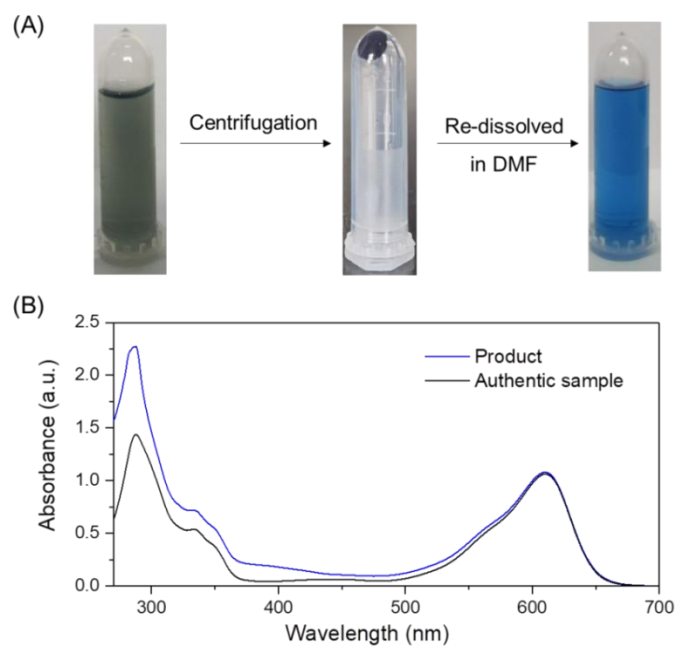

**Figure S4.** (A) Procedure for re-dissolving the product in DMF. The reaction solution of indole, as catalyzed by A15C/H64D/F49Y Ngb, produced blue precipitates after centrifugation, which generated a transparent blue solution by re-dissolving in DMF. (B) UV-Vis spectra of the biosynthesized indigo (blue) and the authentic indigo sample (black) in DMF.

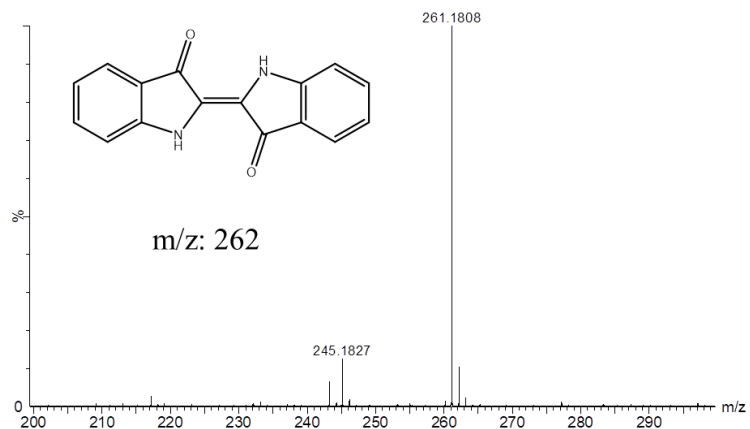

**Figure S5.** ESI-MS spectra of the oxidation product of indole in precipitation catalyzed by A15C/H64D/F49Y Ngb. Indigo ( $C_{16}H_{10}N_2O_2$ ), Calculated: 262.1 Da; Observed: 261.18 Da ( $[M-H]^-$ ).

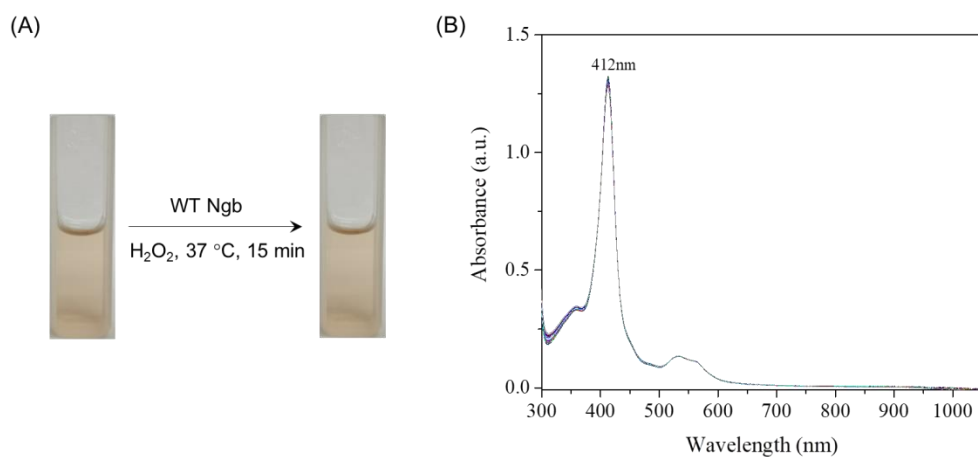

**Figure S6.** (A) Solution color of the oxidation of indole (1 mM) catalyzed by WT Ngb (10  $\mu$ M) with  $H_2O_2$  (1 mM) as an oxidant. (B) UV-Vis spectral changes upon the oxidation of indole catalyzed by WT Ngb.

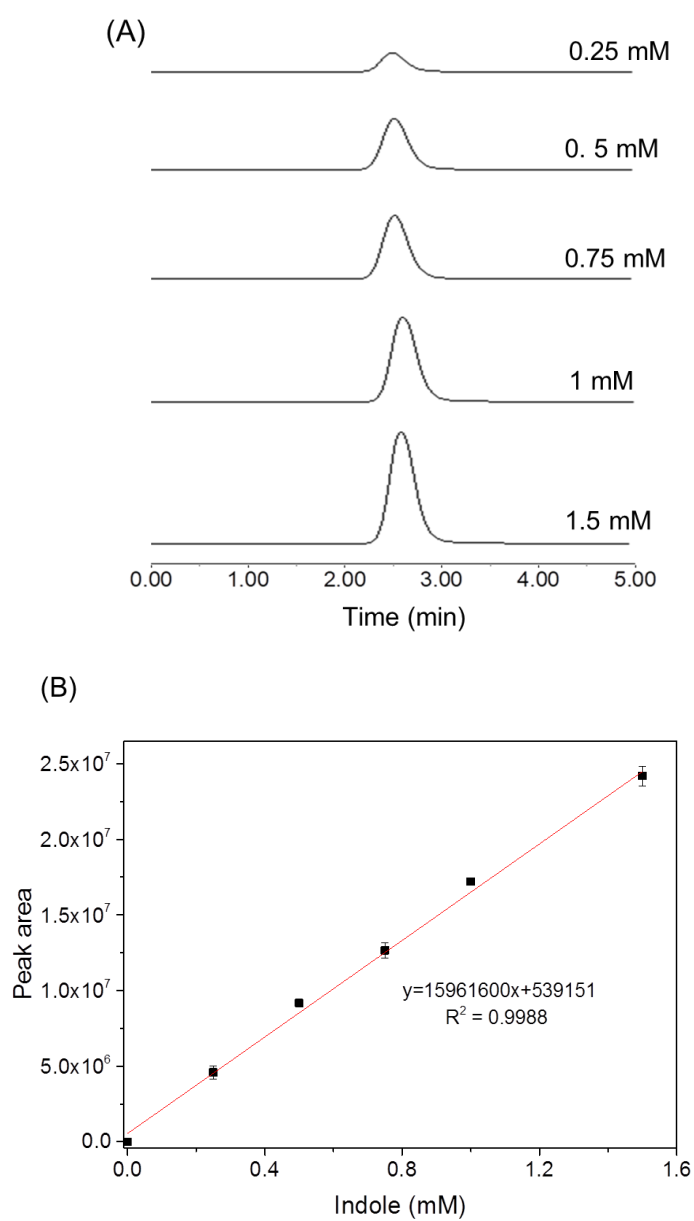

**Figure S7.** HPLC trace of indole (A) and the calibration curve (B).



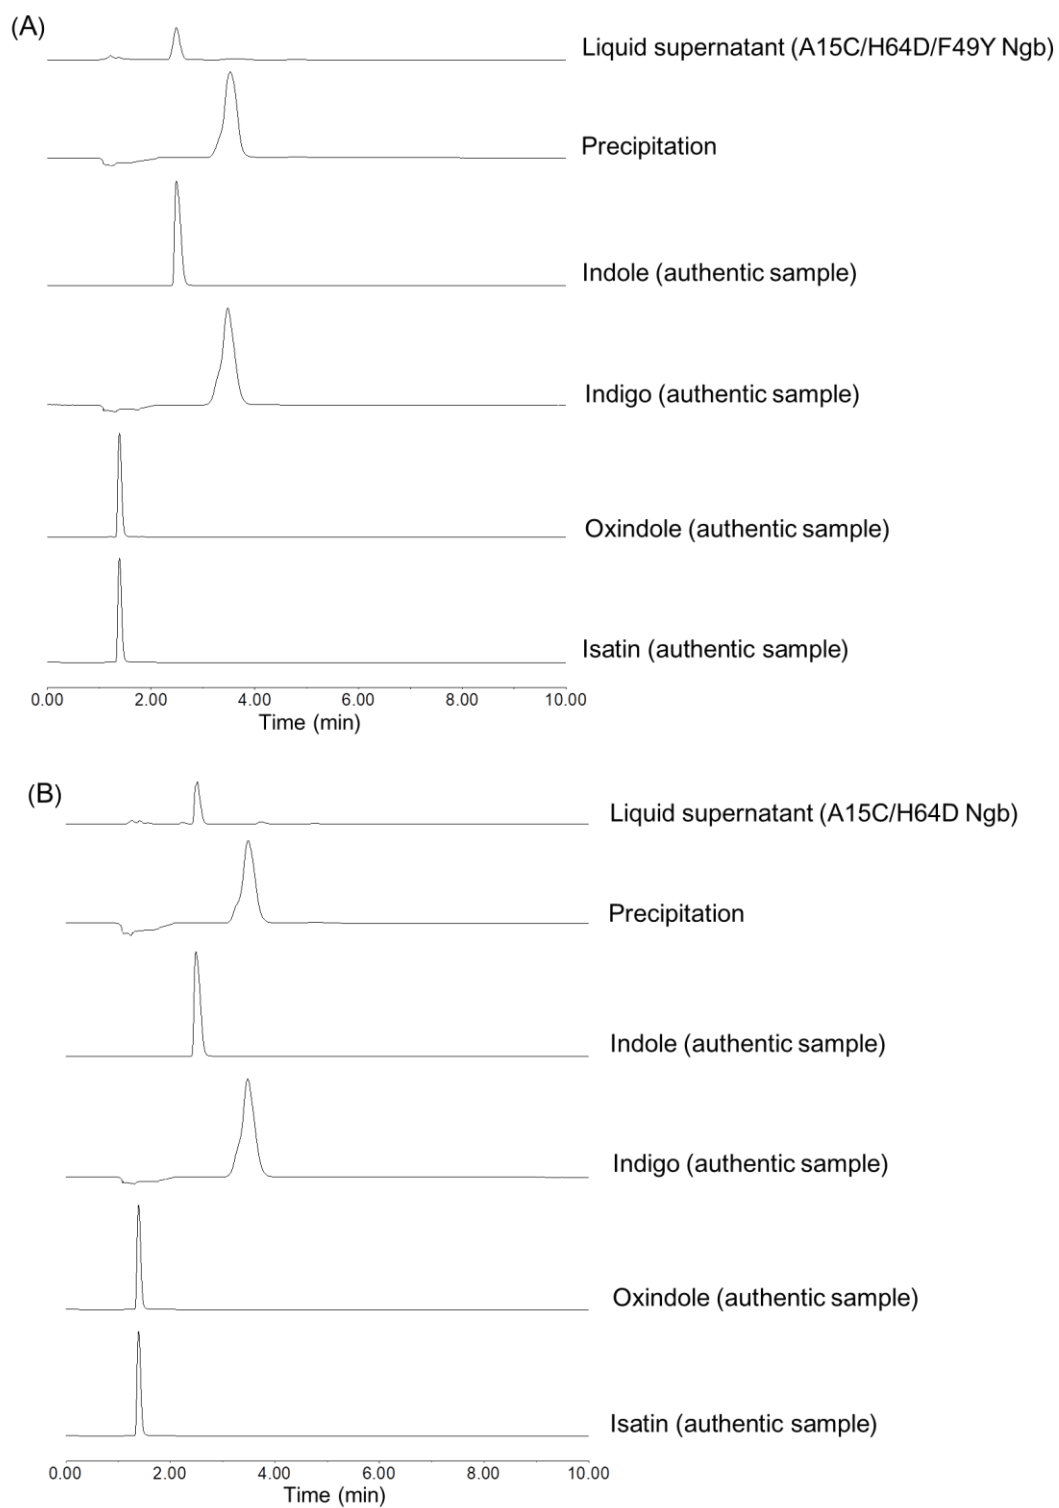

**Figure S8.** HPLC analysis of the extraction from the liquid supernatant and the precipitation of the reaction monitored at 280 nm, as catalyzed by A15C/H64D/F49Y Ngb (A) and A15C/H64D Ngb (B), respectively. HPLC traces of authentic samples of oxindole, isatin and indigo were shown for comparison.

(A) (a)

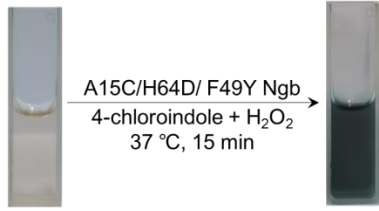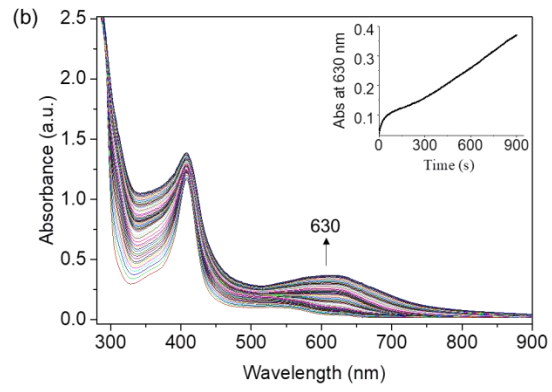

(B) (a)

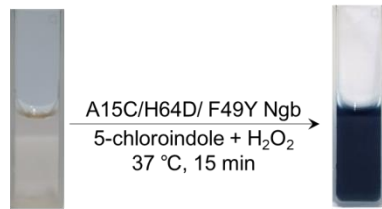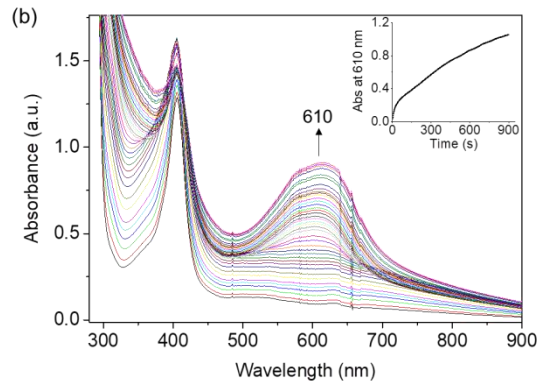

(C) (a)

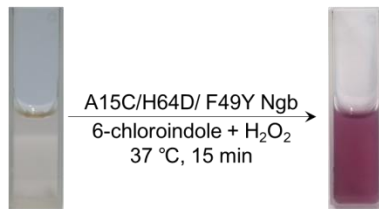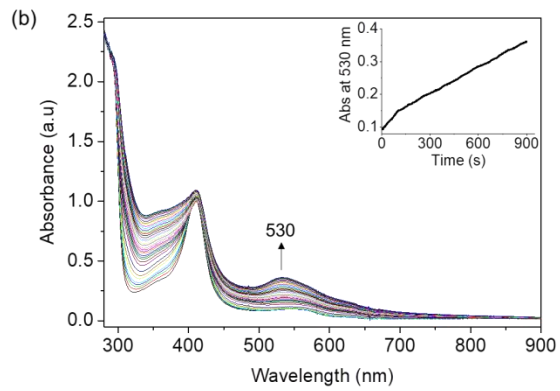

(D) (a)

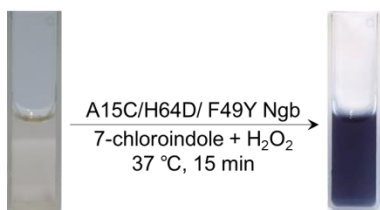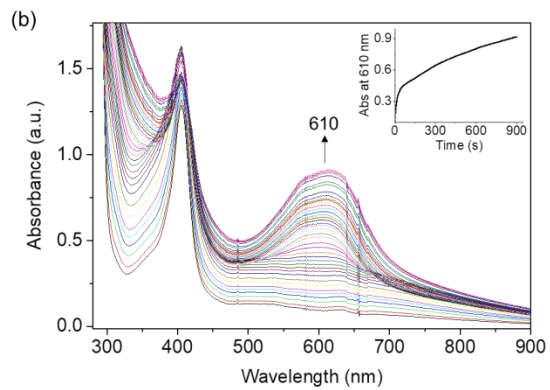

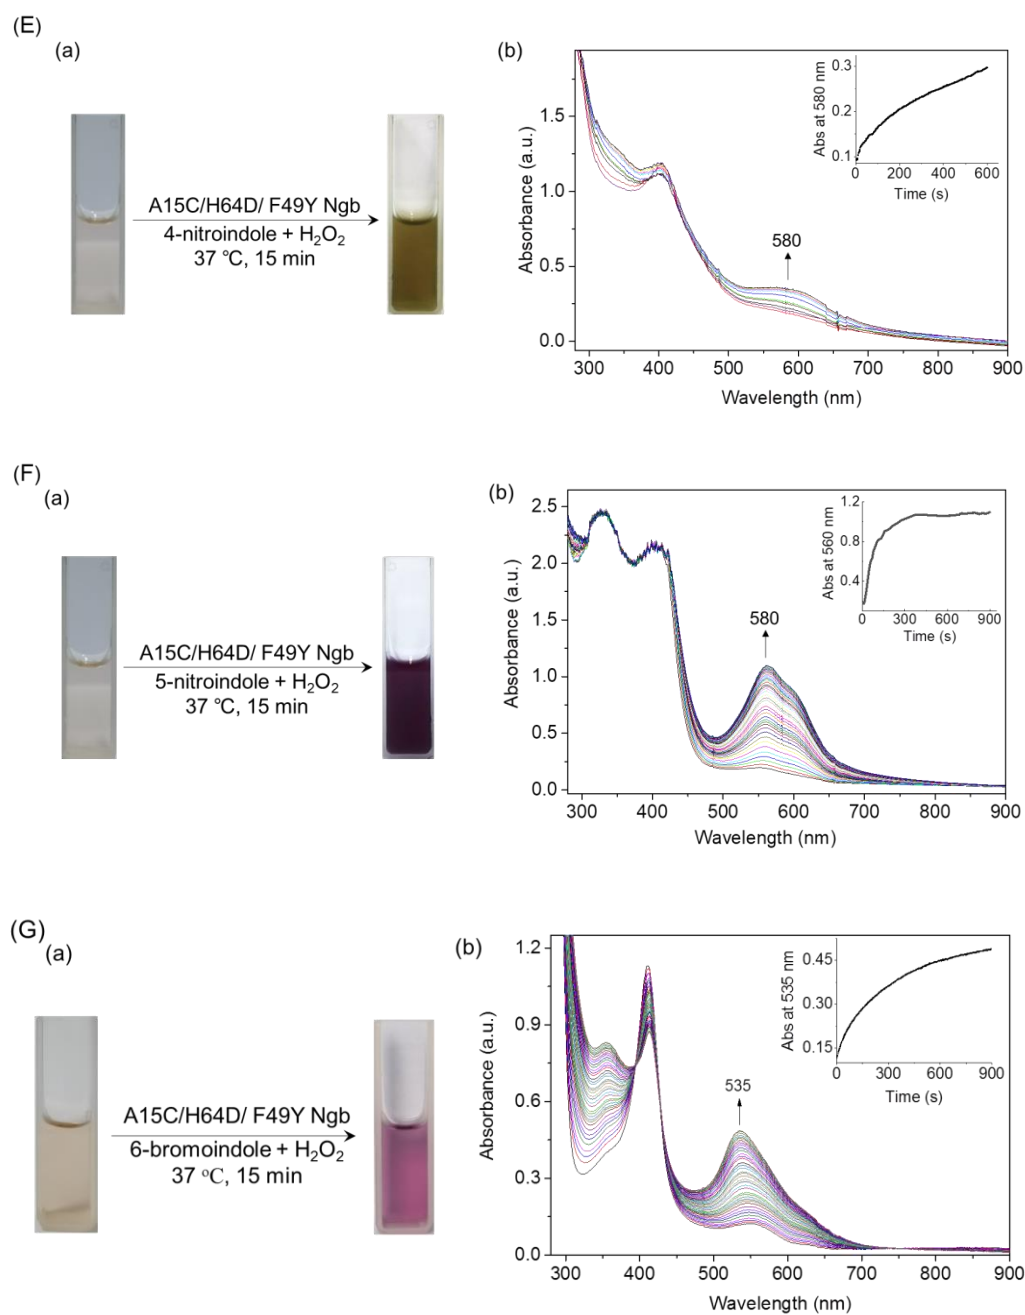

**Figure S9.** The solution color (a) and UV-Vis spectral changes (b) of the oxidation of indole derivatives (1 mM) catalyzed by the A15C/H64D/F49Y Ngb (10  $\mu\text{M}$ ) in 50 mM potassium phosphate buffer (pH 7.0), with 1 mM  $\text{H}_2\text{O}_2$  in a final volume of 2 mL. The reaction was performed at 37  $^\circ\text{C}$  for 15 min. (A) 4-chloroindole, (B) 5-chloroindole, (C) 6-chloroindole, (D) 7-chloroindole, (E) 4-nitroindole, (F) 5-nitroindole and (G) 6-bromoindole.

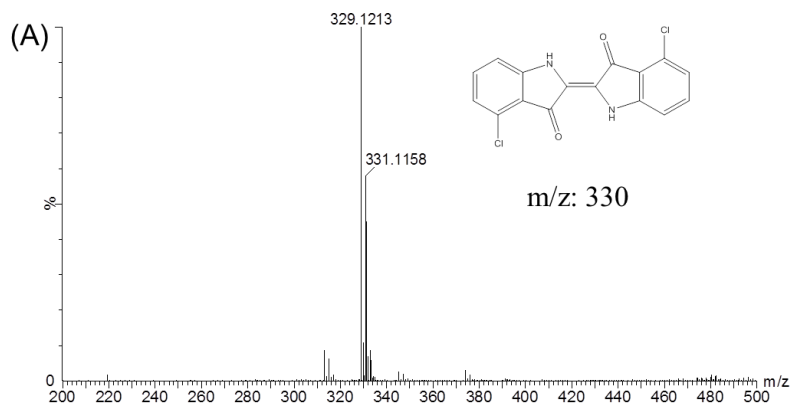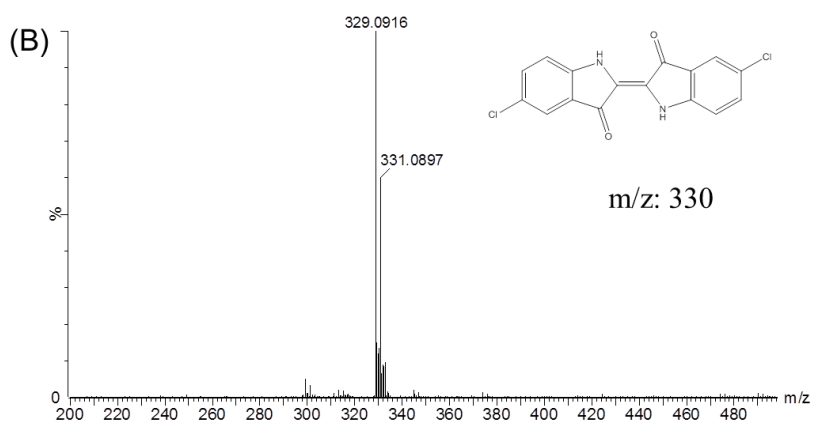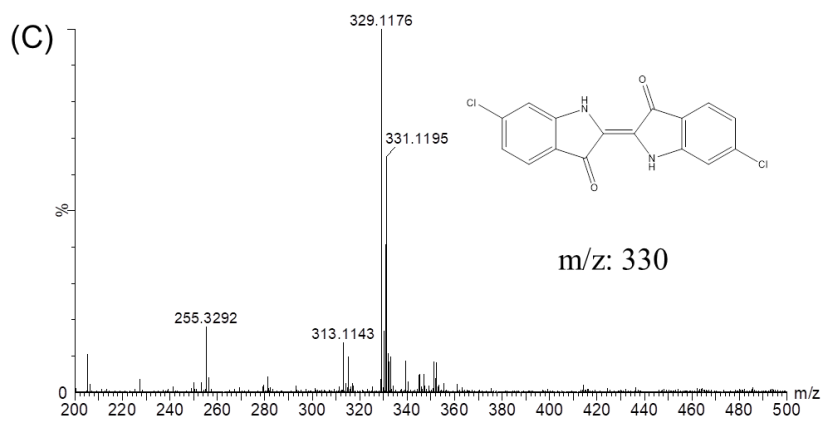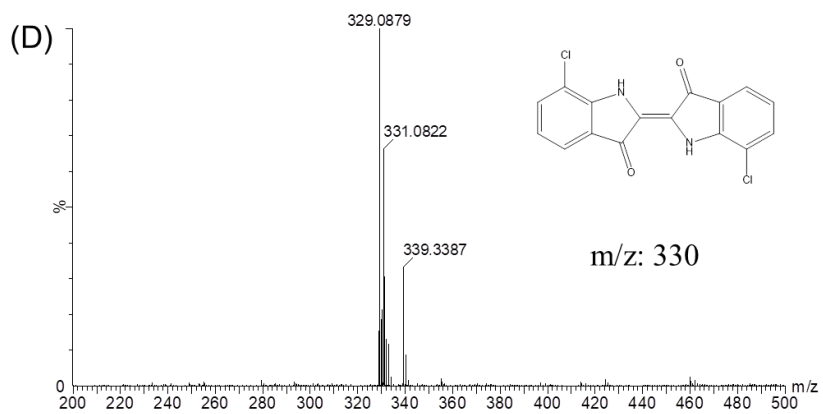

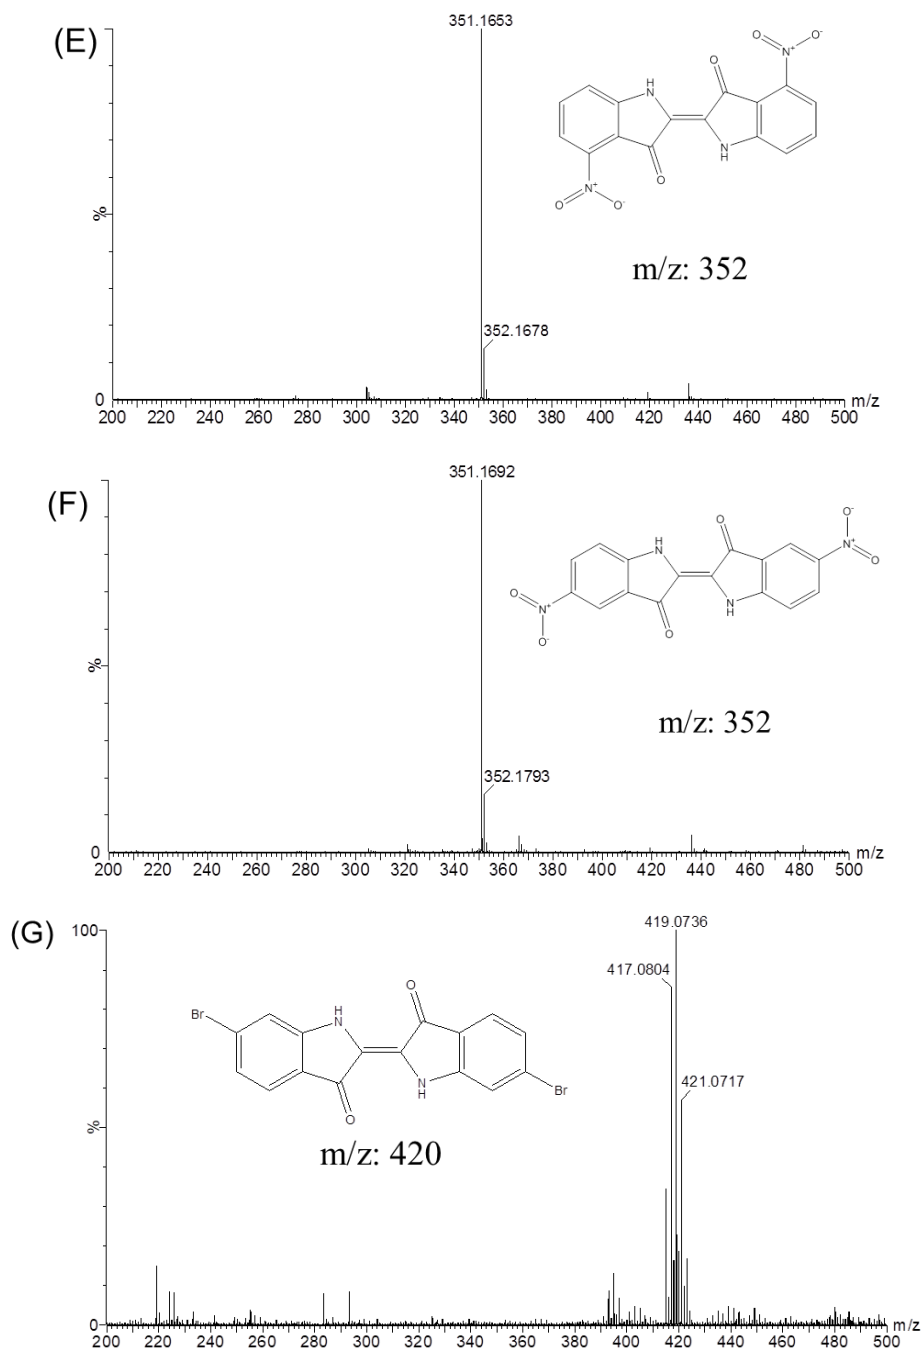

**Figure S10.** ESI-MS of the oxidation products of indole derivatives, 4-chloroindole (A), 5-chloroindole (B), 6-chloroindole (C), 7-chloroindole (D), 4-nitroindole (E), 5-nitroindole (F) and 6-bromoindole (G), as catalyzed by A15C/H64D/F49Y Ngb.

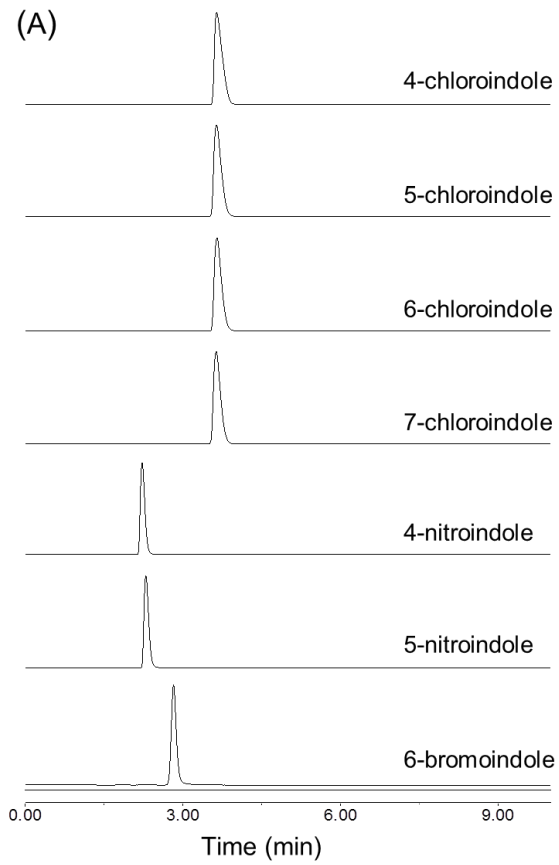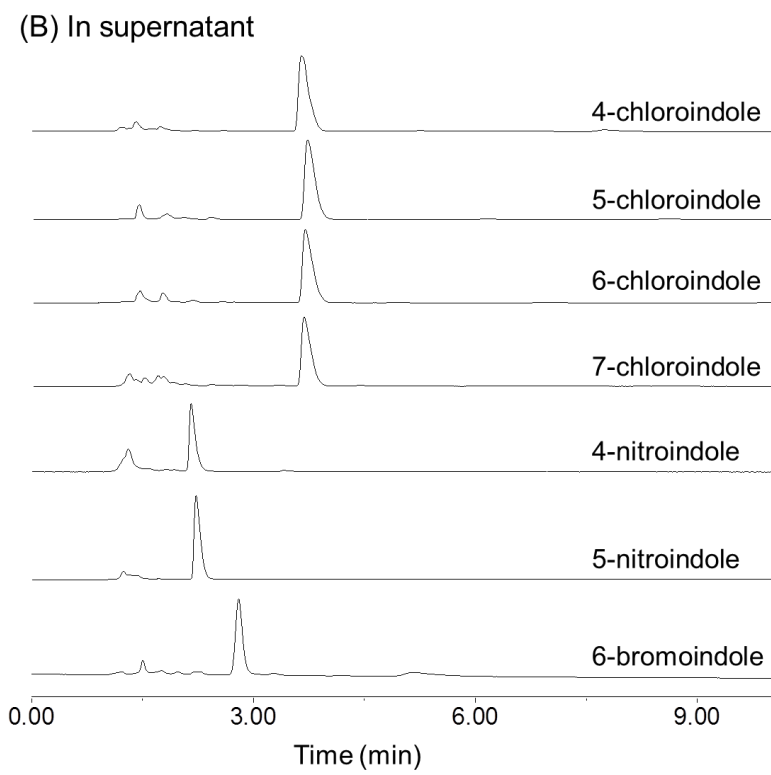

(C) In precipitation

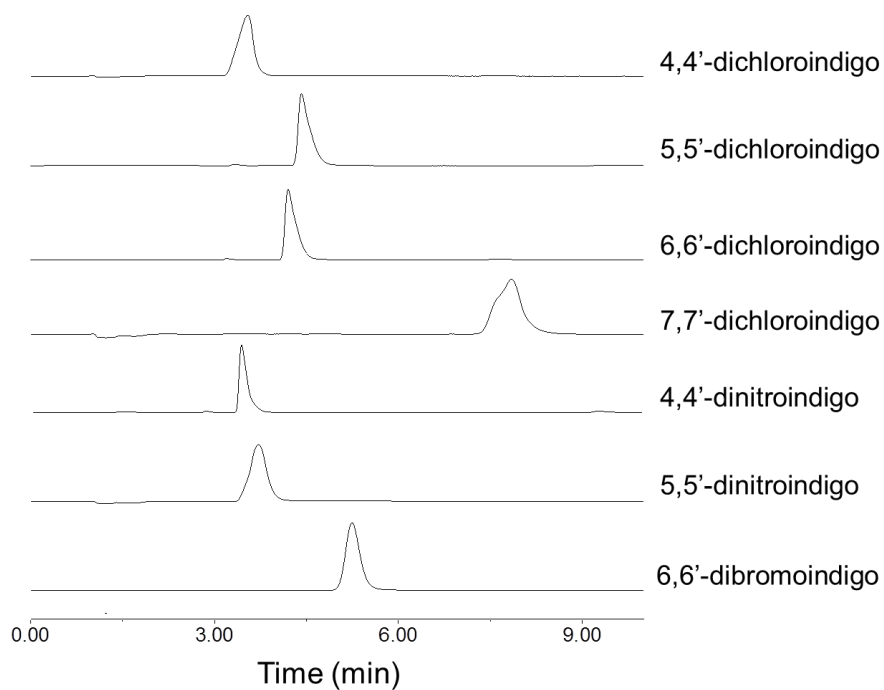

**Figure S11.** (A) HPLC traces of authentic samples of 4-chloroindole, 5-chloroindole, 6-chloroindole, 7-chloroindole, 4-nitroindole, 5-nitroindole and 6-bromoindole, monitored at 280 nm. HPLC analysis of the reaction products in liquid supernatant (B) and precipitation (C) monitored at 280 nm, as catalyzed by A15C/H64D/F49Y Ngb.

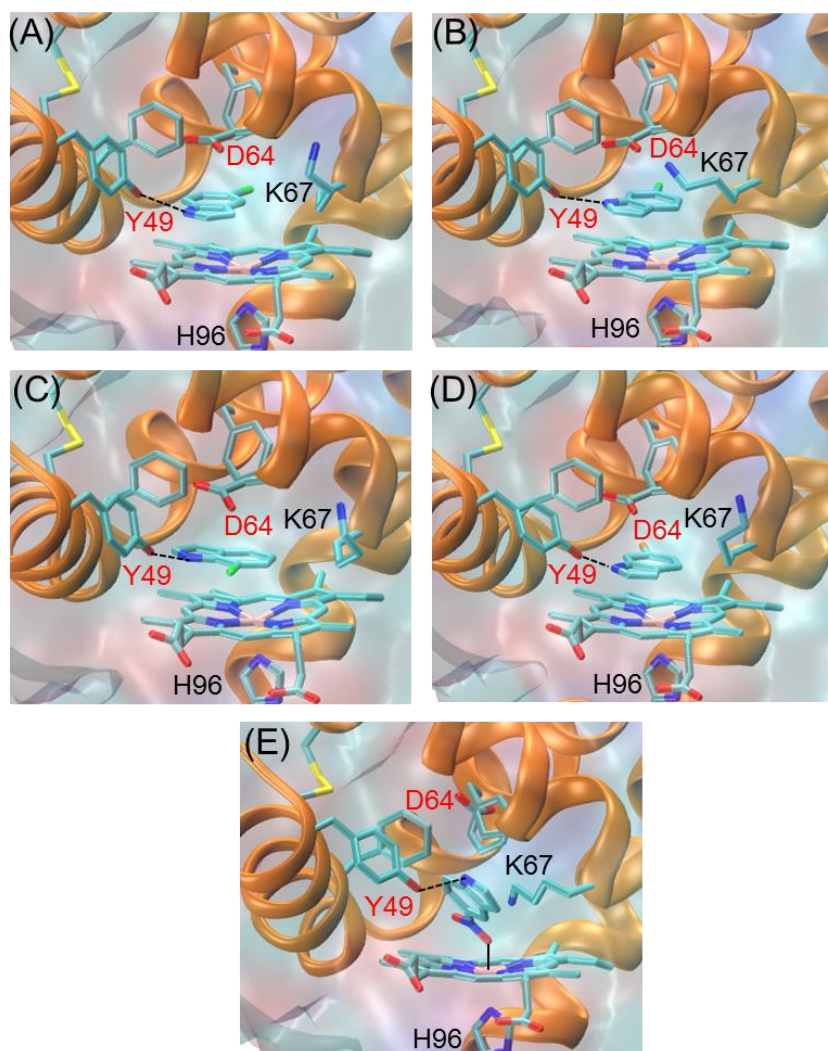

**Figure S12.** Molecular docking structures of (A) 5-chloroindole, (B) 6-chloroindole, (C) 7-chloroindole, (D) 6-bromoindole, and (E) 5-nitroindole in complex with A15C/H64D/F49Y Ngb. The disulfide bond and the heme active were highlighted. The H-bond and coordination interactions are indicated by dashed and solid lines, respectively.



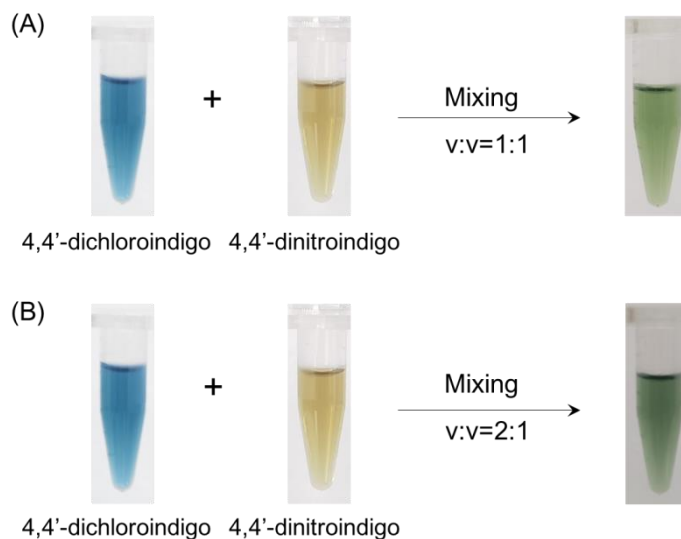

**Figure S13.** Solution color of 4,4'-dichloroindigo and 4,4'-dinitroindigo catalyzed by A15C/H64D/F49Y Ngb (10  $\mu$ M) with the substrate (1 mM), H<sub>2</sub>O<sub>2</sub> (1 mM), at 37 °C for 15 min, and that after mixed in the volume of 1:1 (A) and 2:1 (B), respectively.

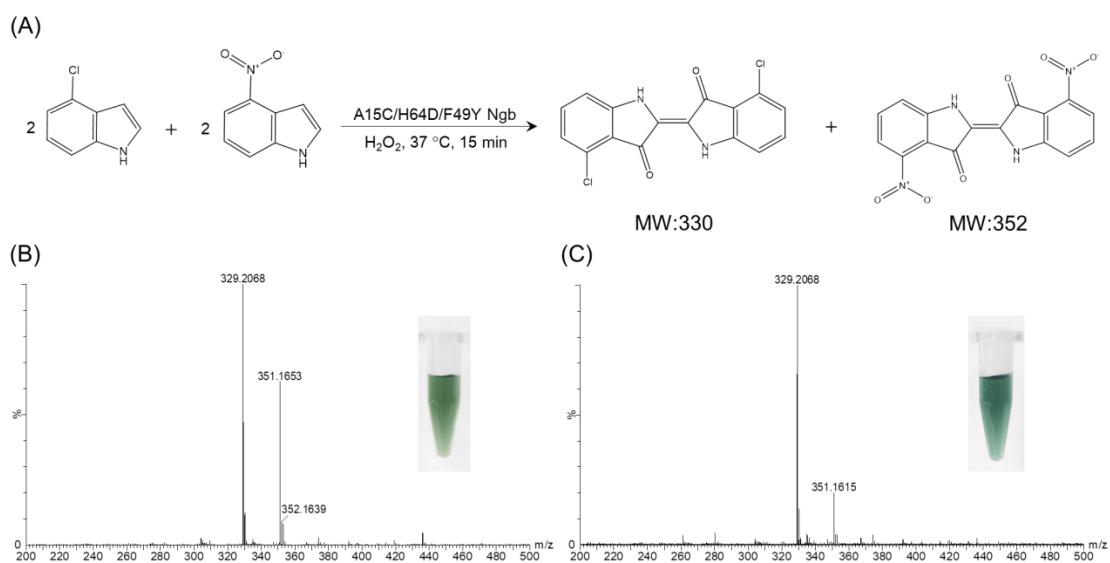

**Figure S14.** Chemical reaction (A) and ESI-MS of the oxidation products of co-substrates (2 mM) containing 4-chloroindole and 4-nitroindole (B, a mole ratio of 1 to 1; C, a mole ratio of 1 to 1), as catalyzed by A15C/H64D/F49Y Ngb (10  $\mu$ M), 1 mM H<sub>2</sub>O<sub>2</sub> in 50 mM potassium phosphate buffer (pH 7.0) at 37 °C for 15 min. The digital photos of the solution after reaction were shown as insets.

**Table S1.** The amounts of indigo, side products and unreacted indole after reaction, as catalyzed by Ngb mutants and determined by HPLC, with those of Mb mutants shown for comparison.

| Protein                           | Indigo<br>( $\mu\text{M}$ ) | Oxindole<br>( $\mu\text{M}$ ) | Isatin<br>( $\mu\text{M}$ ) | Indole<br>( $\mu\text{M}$ ) | Other areas | Indigo yield |
|-----------------------------------|-----------------------------|-------------------------------|-----------------------------|-----------------------------|-------------|--------------|
| A15C/H64D Ngb                     | 288                         | 15                            | 40                          | 177                         | 0.54        | 70%          |
| A15C/H64D/F49Y Ngb                | 340                         | 10                            | 64                          | 167                         | 0.32        | 82%          |
| F43Y Mb <sup>(a)</sup>            | 180                         | 31                            | 59                          | 332                         | 0.021       | 54%          |
| H64D Mb <sup>(b)</sup>            | 36                          | 21                            | 34                          | 643                         | 0.16        | 20%          |
| F43Y/H64D Mb <sup>(a)</sup>       | 120                         | 10                            | 60                          | 292                         | 0.084       | 34%          |
| H64D/V68I/I107V Mb <sup>(b)</sup> | 34                          | 31                            | 46                          | 448                         | 0.18        | 11%          |

(a) Liu *et al.* *RSC Adv.* **2018**, 8, 33325–33330.

(b) Xu *et al.* *Catal. Sci. Technol.* **2012**, 2, 739–744.

**Table S2.** Docking energy of indole binding to A15C/H64D/F49Y Ngb.

| Model | $E_{\text{binding}}^{\text{a}}$ | $E_{\text{inter-mol}}^{\text{b}}$ | $E_{\text{vdw}}^{\text{c}}$ | $E_{\text{elec}}^{\text{d}}$ |
|-------|---------------------------------|-----------------------------------|-----------------------------|------------------------------|
| 1     | -5.82                           | -5.82                             | -1.54                       | 0.08                         |
| 2     | -5.70                           | -5.70                             | -1.09                       | 0.00                         |
| 3     | -5.69                           | -5.69                             | -1.51                       | 0.08                         |
| 4     | -5.67                           | -5.67                             | -1.04                       | 0.06                         |
| 5     | -5.67                           | -5.67                             | -1.22                       | 0.06                         |
| 6     | -5.66                           | -5.66                             | -1.32                       | 0.01                         |
| 7     | -5.64                           | -5.64                             | -1.07                       | 0.03                         |
| 8     | -5.64                           | -5.64                             | -1.06                       | 0.03                         |
| 9     | -5.63                           | -5.63                             | -1.53                       | 0.04                         |
| 10    | -5.63                           | -5.63                             | -1.54                       | 0.04                         |

<sup>a</sup> Binding energy. <sup>b</sup> Intermolecular energy. <sup>c</sup> van der Waals energies. <sup>d</sup> Electrostatic interactions. Unit: kcal/mol.

**Table S3.** Docking energy of 4-chloroindole binding to A15C/H64D/F49Y Ngb.

| Model | $E_{\text{binding}}^{\text{a}}$ | $E_{\text{inter-mol}}^{\text{b}}$ | $E_{\text{vdw}}^{\text{c}}$ | $E_{\text{elec}}^{\text{d}}$ |
|-------|---------------------------------|-----------------------------------|-----------------------------|------------------------------|
| 1     | -6.64                           | -6.64                             | -2.21                       | -0.02                        |
| 2     | -6.64                           | -6.64                             | -1.77                       | 0.05                         |
| 3     | -6.57                           | -6.57                             | -1.73                       | 0.04                         |
| 4     | -6.57                           | -6.57                             | -1.90                       | 0.03                         |
| 5     | -6.56                           | -6.56                             | -1.60                       | 0.02                         |
| 6     | -6.49                           | -6.49                             | -2.05                       | -0.03                        |
| 7     | -6.49                           | -6.49                             | -1.70                       | 0.04                         |
| 8     | -6.48                           | -6.48                             | -1.57                       | 0.01                         |
| 9     | -6.45                           | -6.45                             | -1.67                       | 0.00                         |
| 10    | -6.44                           | -6.44                             | -2.02                       | -0.02                        |

<sup>a</sup> Binding energy. <sup>b</sup> Intermolecular energy. <sup>c</sup> van der Waals energies. <sup>d</sup> Electrostatic interactions. Unit: kcal/mol.

**Table S4.** Docking energy of 5-chloroindole binding to A15C/H64D/F49Y Ngb.

| Model | $E_{\text{binding}}^a$ | $E_{\text{inter-mol}}^b$ | $E_{\text{vdw}}^c$ | $E_{\text{elec}}^d$ |
|-------|------------------------|--------------------------|--------------------|---------------------|
| 1     | -6.93                  | -6.93                    | -2.28              | -0.06               |
| 2     | -6.48                  | -6.48                    | -1.76              | 0.02                |
| 3     | -6.48                  | -6.48                    | -1.71              | 0.02                |
| 4     | -6.38                  | -6.38                    | -1.65              | -0.01               |
| 5     | -6.37                  | -6.37                    | -1.67              | 0.02                |
| 6     | -6.36                  | -6.36                    | -1.71              | 0.01                |
| 7     | -6.35                  | -6.35                    | -1.58              | -0.02               |
| 8     | -6.33                  | -6.33                    | -1.63              | 0.01                |
| 9     | -6.32                  | -6.32                    | -1.80              | -0.01               |
| 10    | -6.30                  | -6.30                    | -1.58              | -0.01               |

<sup>a</sup> Binding energy. <sup>b</sup> Intermolecular energy. <sup>c</sup> van der Waals energies. <sup>d</sup> Electrostatic interactions. Unit: kcal/mol.

**Table S5.** Docking energy of 6-chloroindole binding to A15C/H64D/F49Y Ngb.

| Model | $E_{\text{binding}}^a$ | $E_{\text{inter-mol}}^b$ | $E_{\text{vdw}}^c$ | $E_{\text{elec}}^d$ |
|-------|------------------------|--------------------------|--------------------|---------------------|
| 1     | -6.50                  | -6.50                    | -1.83              | 0.10                |
| 2     | -6.49                  | -6.49                    | -1.69              | 0.06                |
| 3     | -6.36                  | -6.36                    | -1.65              | 0.08                |
| 4     | -6.36                  | -6.36                    | -1.56              | 0.07                |
| 5     | -6.31                  | -6.31                    | -1.66              | 0.09                |
| 6     | -6.31                  | -6.31                    | -1.63              | 0.04                |
| 7     | -6.29                  | -6.29                    | -1.40              | 0.02                |
| 8     | -6.24                  | -6.24                    | -1.42              | 0.01                |
| 9     | -6.23                  | -6.23                    | -1.11              | -0.03               |
| 10    | -6.21                  | -6.21                    | -1.45              | 0.01                |

<sup>a</sup> Binding energy. <sup>b</sup> Intermolecular energy. <sup>c</sup> van der Waals energies. <sup>d</sup> Electrostatic interactions. Unit: kcal/mol.

**Table S6.** Docking energy of 7-chloroindole binding to A15C/H64D/F49Y Ngb.

| Model | $E_{\text{binding}}^{\text{a}}$ | $E_{\text{inter-mol}}^{\text{b}}$ | $E_{\text{vdw}}^{\text{c}}$ | $E_{\text{elec}}^{\text{d}}$ |
|-------|---------------------------------|-----------------------------------|-----------------------------|------------------------------|
| 1     | -6.37                           | -6.37                             | -2.08                       | 0.04                         |
| 2     | -6.32                           | -6.32                             | -1.77                       | 0.08                         |
| 3     | -6.31                           | -6.31                             | -1.64                       | 0.02                         |
| 4     | -6.25                           | -6.25                             | -1.82                       | 0.04                         |
| 5     | -6.23                           | -6.23                             | -1.48                       | -0.03                        |
| 6     | -6.20                           | -6.20                             | -1.76                       | 0.05                         |
| 7     | -6.20                           | -6.20                             | -1.56                       | 0.01                         |
| 8     | -6.18                           | -6.18                             | -1.10                       | 0.00                         |
| 9     | -6.18                           | -6.18                             | -1.75                       | 0.01                         |
| 10    | -6.15                           | -6.15                             | -1.41                       | -0.04                        |

<sup>a</sup> Binding energy. <sup>b</sup> Intermolecular energy. <sup>c</sup> van der Waals energies. <sup>d</sup> Electrostatic interactions. Unit: kcal/mol.

**Table S7.** Docking energy of 4-nitroindole binding to A15C/H64D/F49Y Ngb.

| Model | $E_{\text{binding}}^{\text{a}}$ | $E_{\text{inter-mol}}^{\text{b}}$ | $E_{\text{vdw}}^{\text{c}}$ | $E_{\text{elec}}^{\text{d}}$ |
|-------|---------------------------------|-----------------------------------|-----------------------------|------------------------------|
| 1     | -13.89                          | -14.19                            | -3.31                       | -1.79                        |
| 2     | -13.35                          | -14.65                            | -2.25                       | -0.36                        |
| 3     | -13.13                          | -13.43                            | -2.08                       | -0.07                        |
| 4     | -13.05                          | -13.35                            | -1.85                       | -0.18                        |
| 5     | -13.03                          | -13.32                            | -1.72                       | -0.07                        |
| 6     | -13.02                          | -13.32                            | -1.81                       | -0.06                        |
| 7     | -13.01                          | -13.31                            | -1.83                       | -0.06                        |
| 8     | -13.00                          | -13.29                            | -2.03                       | -0.09                        |
| 9     | -13.00                          | -13.30                            | -1.68                       | -0.08                        |
| 10    | -12.97                          | -13.27                            | -2.21                       | -0.15                        |

<sup>a</sup> Binding energy. <sup>b</sup> Intermolecular energy. <sup>c</sup> van der Waals energies. <sup>d</sup> Electrostatic interactions. Unit: kcal/mol.

**Table S8.** Docking energy of 5-nitroindole binding to A15C/H64D/F49Y Ngb.

| Model | $E_{\text{binding}}^{\text{a}}$ | $E_{\text{inter-mol}}^{\text{b}}$ | $E_{\text{vdw}}^{\text{c}}$ | $E_{\text{elec}}^{\text{d}}$ |
|-------|---------------------------------|-----------------------------------|-----------------------------|------------------------------|
| 1     | -13.01                          | -13.31                            | -3.09                       | -1.50                        |
| 2     | -12.69                          | -12.99                            | -2.32                       | -1.13                        |
| 3     | -12.50                          | -12.80                            | -2.05                       | -1.01                        |
| 4     | -12.39                          | -12.69                            | -1.89                       | -1.09                        |
| 5     | -12.37                          | -12.67                            | -2.12                       | -1.13                        |
| 6     | -12.08                          | -12.37                            | -2.40                       | -1.09                        |
| 7     | -12.07                          | -12.37                            | -1.91                       | -0.04                        |
| 8     | -11.82                          | -12.12                            | -1.73                       | -0.03                        |
| 9     | -11.76                          | -12.06                            | -1.65                       | -0.05                        |
| 10    | -11.75                          | -12.05                            | -1.79                       | -0.18                        |

<sup>a</sup> Binding energy. <sup>b</sup> Intermolecular energy. <sup>c</sup> van der Waals energies. <sup>d</sup> Electrostatic interactions. Unit: kcal/mol.

**Table S9.** Docking energy of 6-bromoindole binding to A15C/H64D/F49Y Ngb.

| Model | $E_{\text{binding}}^{\text{a}}$ | $E_{\text{inter-mol}}^{\text{b}}$ | $E_{\text{vdw}}^{\text{c}}$ | $E_{\text{elec}}^{\text{d}}$ |
|-------|---------------------------------|-----------------------------------|-----------------------------|------------------------------|
| 1     | -7.15                           | -7.15                             | -2.34                       | 0.03                         |
| 2     | -7.14                           | -7.14                             | -2.29                       | 0.08                         |
| 3     | -7.14                           | -7.14                             | -2.15                       | 0.02                         |
| 4     | -7.09                           | -7.09                             | -2.26                       | 0.08                         |
| 5     | -7.07                           | -7.07                             | -2.20                       | 0.03                         |
| 6     | -7.04                           | -7.04                             | -2.11                       | 0.01                         |
| 7     | -7.04                           | -7.04                             | -2.03                       | -0.02                        |
| 8     | -7.01                           | -7.01                             | -2.14                       | 0.01                         |
| 9     | -7.00                           | -7.00                             | -2.21                       | 0.08                         |
| 10    | -6.99                           | -6.99                             | -2.07                       | 0.00                         |

<sup>a</sup> Binding energy. <sup>b</sup> Intermolecular energy. <sup>c</sup> van der Waals energies. <sup>d</sup> Electrostatic interactions. Unit: kcal/mol.
